# Supplementary material for: Effect of Home-Based High-Intensity Interval Training in Patients With Lacunar Stroke: A Randomized Controlled Trial
Source: PubMed Central journal article supplement (PMC6611174; doi:10.3389/fneur.2019.00664), 2019-06-28
Supplement: Image_2.pdf [file Image_2.pdf]

| Week no.                                                                                                            | -2 | -1 | Baseline assessment | 1 | 2 | 3 | 4 | 5 | 6 | 7 | 8 | 9 | 10 | 11 | 12 | Post-intervention assessment | 13 |
|---------------------------------------------------------------------------------------------------------------------|----|----|---------------------|---|---|---|---|---|---|---|---|---|----|----|----|------------------------------|----|
| <b>Cardiorespiratory fitness</b>                                                                                    |    |    | X                   |   |   |   |   |   |   |   |   |   |    |    |    | X                            |    |
| <b>Post-stroke fatigue</b>                                                                                          |    |    | X                   |   |   |   |   |   |   |   |   |   |    |    |    | X                            |    |
| <b>Chronic stress</b>                                                                                               |    |    | X                   |   |   |   |   |   |   |   |   |   |    |    |    | X                            |    |
| <b>Depression</b>                                                                                                   |    |    | X                   |   |   |   |   |   |   |   |   |   |    |    |    | X                            |    |
| <b>Mental well-being</b>                                                                                            |    |    | X                   |   |   |   |   |   |   |   |   |   |    |    |    | X                            |    |
| <b>Cognition</b>                                                                                                    |    |    | X                   |   |   |   |   |   |   |   |   |   |    |    |    | X                            |    |
| <b>Endothelial function and arterial stiffness</b>                                                                  |    |    | X                   |   |   |   |   |   |   |   |   |   |    |    |    | X                            |    |
| <b>Blood pressure</b>                                                                                               |    |    | X                   |   |   |   |   |   |   |   |   |   |    |    |    | X                            |    |
| <b>Biomarkers</b>                                                                                                   |    |    | X                   |   |   |   |   |   |   |   |   |   |    |    |    | X                            |    |
| <b>BMI</b>                                                                                                          |    |    | X                   |   |   |   |   |   |   |   |   |   |    |    |    | X                            |    |
| <b>AX3, recording 8 days from assessment</b>                                                                        |    |    | →                   |   |   |   |   |   |   |   |   |   |    |    |    |                              | →  |
| <b>PAS2, questionnaire returned on assessment visit, reporting average physical activity for the past two weeks</b> | ←  |    |                     |   |   |   |   |   |   |   |   |   |    | ←  |    |                              |    |

**Figure S2. Time schedule for study assessments.**

AX3: an accelerometer measuring activity patterns for everyday physical activity.

PAS2: Physical Activity Scale version 2.1 - a self-reported questionnaire of average time spent on everyday physical activity at different intensities.
